# Supplementary material for: Optimal Androgen Deprivation Therapy Combined with Proton Beam Therapy for Prostate Cancer: Results from a Multi-Institutional Study of the Japanese Radiation Oncology Study Group
Source: MDPI journal article supplement (doi:10.3390/cancers12061690), 2020-06-25
Supplement: s1 [file s1]

# Optimal Androgen Deprivation Therapy Combined with Proton Beam Therapy for Prostate Cancer: Results from a Multi-Institutional Study of the Japanese Radiation Oncology Study Group

Motohiro Murakami, Hitoshi Ishikawa, Shosei Shimizu, Hiromitsu Iwata, Tomoaki Okimoto, Masaru Takagi, Shigeyuki Murayama, Tetsuo Akimoto, Hitoshi Wada, Takeshi Arimura, Yoshitaka Sato, Masahiko Goshō, Katsumasa Nakamura and Hideyuki Sakurai

## Supplementary Materials:

**Table S1.** Hazard ratios for biochemical relapse-free survival in intermediate- and high-risk PC patients with a single risk factor.

| NCCN risk classification              | Risk factor           | HR (95% CI)       | <i>p</i> |
|---------------------------------------|-----------------------|-------------------|----------|
| Intermediate-risk factor <sup>a</sup> | T stage 2b–2c         | 3.71 (0.19–73.85) | 0.391    |
|                                       | PSA level 10–20 ng/mL | 3.84 (0.39–37.67) | 0.248    |
|                                       | Gleason score 7       | 0.42 (0.11–1.52)  | 0.186    |
| High-risk factor <sup>b</sup>         | T stage 3a–4          | 1.68 (0.14–19.71) | 0.681    |
|                                       | PSA level >20 ng/mL   | *                 | *        |
|                                       | Gleason score ≥8      | 0.48 (0.20–1.14)  | 0.097    |

<sup>a</sup> Intermediate-risk patients who received versus did not receive ADT were compared. <sup>b</sup> High-risk patients who received ADT for ≤6 months versus >6 months were compared. \* Analysis could not be performed because there were no biochemical relapse events in the patients who received ADT for >6 months. ADT, androgen deprivation therapy; HR, hazard ratio; CI, confidence interval.

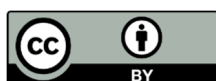

© 2020 by the authors. Submitted for possible open access publication under the terms and conditions of the Creative Commons Attribution (CC BY) license (<http://creativecommons.org/licenses/by/4.0/>).
